# Supplementary material for: The Antitumor Activity of a Lead Thioxanthone is Associated with Alterations in Cholesterol Localization
Source: MDPI journal article supplement (doi:10.3390/molecules23123301), 2018-12-12
Supplement: s1 [file s1]

## Supplementary Material

### The Antitumor Activity of a Lead Thioxanthone is Associated with Alterations in Cholesterol Localization.

Raquel T. Lima, Diana Sousa, Ana Sara Gomes, Nuno Mendes, Rune Matthiesen, Madalena Pedro, Franklim Marques, Madalena M. Pinto, Emília Sousa, M. Helena Vasconcelos

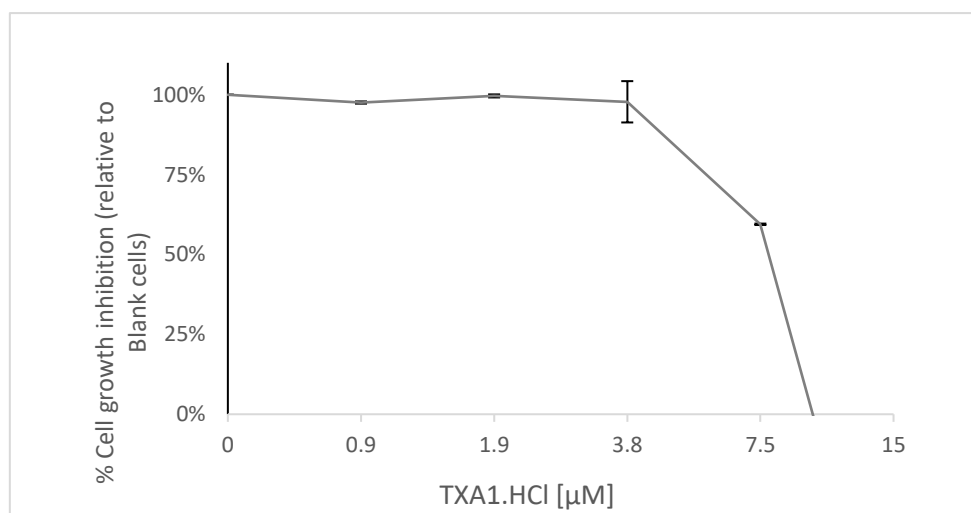

**Figure S1.** Dose-response curve for TXA1.HCl in NCI-H460 cells, analyzed with the sulphorodamine B assay. Cells were treated for 48 h with increasing concentrations of TXA1.HCl. Cell growth inhibition is expressed as % of Blank cells (cells treated with medium only). Results are expressed as the mean  $\pm$  SEM of at least three independent experiments. The maximum vehicle (saline) concentration was also analysed, as a control, and had no effect on cell growth (*data not shown*).

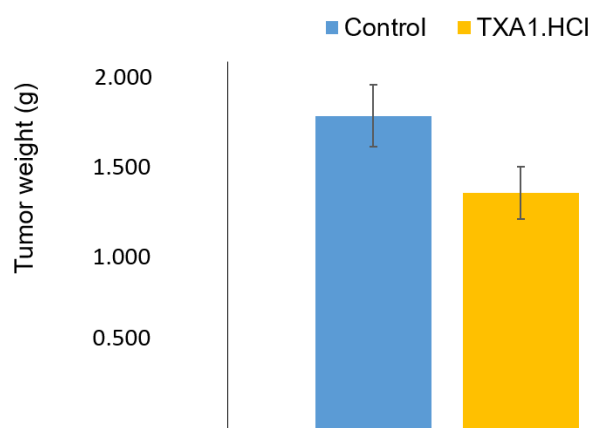

**Figure S2.** Tumor weight after treatment with TXA1.HCl. Nude mice bearing tumor xenografts (40-80 mm<sup>3</sup>) were injected 3 times per week with TXA1.HCl (50 mg/kg,  $n = 7$ ) or vehicle control (saline,  $n = 7$ ). After 22 days, tumors were resected and their weight was measured. Results are expressed as the mean  $\pm$  SEM ( $n = 7$ ).

**Table S1** Gene expression alterations in NCI-H460 cells induced by TXA1.HCl treatment.

|           | Symbol  | Description                                                                                                  | p.adjusted |   | Fold Change |
|-----------|---------|--------------------------------------------------------------------------------------------------------------|------------|---|-------------|
| 3157_at   | HMGCS1  | <b>3-hydroxy-3-methylglutaryl-CoA synthase 1 (soluble) [Source:HGNC Symbol;Acc:5007]</b>                     | 0.000065   | + | <b>4.45</b> |
| 58528_at  | RRAGD   | Ras-related GTP binding D [Source:HGNC Symbol;Acc:19903]                                                     | 0.000364   | + | 3.82        |
| 9388_at   | LIPG    | lipase, endothelial [Source:HGNC Symbol;Acc:6623]                                                            | 0.000364   | + | 3.58        |
| 3638_at   | INSIG1  | insulin induced gene 1 [Source:HGNC Symbol;Acc:6083]                                                         | 0.000137   | + | 3.26        |
| 9201_at   | DCLK1   | doublecortin-like kinase 1 [Source:HGNC Symbol;Acc:2700]                                                     | 0.000095   | + | 3.11        |
| 9518_at   | GDF15   | growth differentiation factor 15 [Source:HGNC Symbol;Acc:30142]                                              | 0.000065   | + | 2.91        |
| 4312_at   | MMP1    | matrix metalloproteinase 1 (interstitial collagenase) [Source:HGNC Symbol;Acc:7155]                          | 0.00007    | + | 2.89        |
| 4758_at   | NEU1    | sialidase 1 (lysosomal sialidase) [Source:HGNC Symbol;Acc:7758]                                              | 0.000137   | + | 2.83        |
| 3156_at   | HMGCR   | <b>3-hydroxy-3-methylglutaryl-CoA reductase [Source:HGNC Symbol;Acc:5006]</b>                                | 0.000065   | + | <b>2.74</b> |
| 80339_at  | PNPLA3  | patatin-like phospholipase domain containing 3 [Source:HGNC Symbol;Acc:18590]                                | 0.001397   | + | 2.69        |
| 230_at    | ALDOC   | aldolase C, fructose-bisphosphate [Source:HGNC Symbol;Acc:418]                                               | 0.000168   | + | 2.60        |
| 4597_at   | MVD     | <b>mevalonate (diphospho) decarboxylase [Source:HGNC Symbol;Acc:7529]</b>                                    | 0.000148   | + | <b>2.57</b> |
| 255394_at | TCP11L2 | t-complex 11, testis-specific-like 2 [Source:HGNC Symbol;Acc:28627]                                          | 0.001397   | + | 2.54        |
| 55902_at  | ACSS2   | acyl-CoA synthetase short-chain family member 2 [Source:HGNC Symbol;Acc:15814]                               | 0.000974   | + | 2.47        |
| 54800_at  | KLHL24  | kelch-like family member 24 [Source:HGNC Symbol;Acc:25947]                                                   | 0.001407   | + | 2.46        |
| 6307_at   | MSMO1   | <b>methylsterol monooxygenase 1 [Source:HGNC Symbol;Acc:10545]</b>                                           | 0.00009    | + | <b>2.46</b> |
| 7108_at   | TM7SF2  | <b>transmembrane 7 superfamily member 2 [Source:HGNC Symbol;Acc:11863]</b>                                   | 0.004175   | + | <b>2.43</b> |
| 5208_at   | PFKFB2  | 6-phosphofructo-2-kinase/fructose-2,6-bisphosphatase 2 [Source:HGNC Symbol;Acc:8873]                         | 0.00109    | + | 2.41        |
| 6713_at   | SQLE    | <b>squalene epoxidase [Source:HGNC Symbol;Acc:11279]</b>                                                     | 0.000137   | + | <b>2.32</b> |
| 11082_at  | ESM1    | endothelial cell-specific molecule 1 [Source:HGNC Symbol;Acc:3466]                                           | 0.003379   | + | 2.31        |
| 4047_at   | LSS     | <b>lanosterol synthase (2,3-oxidosqualene-lanosterol cyclase) [Source:HGNC Symbol;Acc:6708]</b>              | 0.000168   | + | <b>2.30</b> |
| 1958_at   | EGR1    | early growth response 1 [Source:HGNC Symbol;Acc:3238]                                                        | 0.000148   | + | 2.28        |
| 4856_at   | NOV     | nephroblastoma overexpressed [Source:HGNC Symbol;Acc:7885]                                                   | 0.000754   | + | 2.24        |
| 3373_at   | HYAL1   | hyaluronoglucosaminidase 1 [Source:HGNC Symbol;Acc:5320]                                                     | 0.001115   | + | 2.21        |
| 2919_at   | CXCL1   | chemokine (C-X-C motif) ligand 1 (melanoma growth stimulating activity, alpha) [Source:HGNC Symbol;Acc:4602] | 0.004308   | + | 2.18        |
| 4598_at   | MVK     | <b>mevalonate kinase [Source:HGNC Symbol;Acc:7530]</b>                                                       | 0.000807   | + | <b>2.14</b> |
| 55062_at  | WIPI1   | WD repeat domain, phosphoinositide interacting 1 [Source:HGNC Symbol;Acc:25471]                              | 0.00109    | + | 2.13        |

|           |                  |                                                                                                                     |          |   |             |
|-----------|------------------|---------------------------------------------------------------------------------------------------------------------|----------|---|-------------|
| 9245_at   | GCNT3            | glucosaminyl (N-acetyl) transferase 3, mucin type [Source:HGNC Symbol;Acc:4205]                                     | 0.003756 | + | 2.12        |
| 1718_at   | DHCR24           | <b>24-dehydrocholesterol reductase [Source:HGNC Symbol;Acc:2859]</b>                                                | 0.000148 | + | <b>2.11</b> |
| 3422_at   | IDI1             | <b>isopentenyl-diphosphate delta isomerase 1 [Source:HGNC Symbol;Acc:5387]</b>                                      | 0.000653 | + | <b>2.10</b> |
| 39_at     | ACAT2            | <b>acetyl-CoA acetyltransferase 2 [Source:HGNC Symbol;Acc:94]</b>                                                   | 0.000148 | + | <b>2.10</b> |
| 80274_at  | SCUBE1           | signal peptide, CUB domain, EGF-like 1 [Source:HGNC Symbol;Acc:13441]                                               | 0.000549 | + | 2.08        |
| 9415_at   | FADS2            | fatty acid desaturase 2 [Source:HGNC Symbol;Acc:3575]                                                               | 0.002159 | + | 2.06        |
| 2180_at   | ACSL1            | acyl-CoA synthetase long-chain family member 1 [Source:HGNC Symbol;Acc:3569]                                        | 0.000818 | + | 2.06        |
| 728228_at | RP4-<br>779E11.3 |                                                                                                                     | 0.011305 | + | 2.05        |
| 112464_at | PRKCDBP          | protein kinase C, delta binding protein [Source:HGNC Symbol;Acc:9400]                                               | 0.002591 | + | 2.03        |
| 7357_at   | UGCG             | UDP-glucose ceramide glucosyltransferase [Source:HGNC Symbol;Acc:12524]                                             | 0.001136 | + | 2.01        |
| 3725_at   | JUN              | jun proto-oncogene [Source:HGNC Symbol;Acc:6204]                                                                    | 0.001397 | + | 2.01        |
| 197187_at | SNAI3-AS1        | SNAI3 antisense RNA 1 [Source:HGNC Symbol;Acc:28327]                                                                | 0.011874 | + | 2.00        |
| 201799_at | TMEM154          | transmembrane protein 154 [Source:HGNC Symbol;Acc:26489]                                                            | 0.015656 | + | 1.99        |
| 1595_at   | CYP51A1          | <b>cytochrome P450, family 51, subfamily A, polypeptide 1 [Source:HGNC Symbol;Acc:2649]</b>                         | 0.001585 | + | <b>1.97</b> |
| 79152_at  | FA2H             | fatty acid 2-hydroxylase [Source:HGNC Symbol;Acc:21197]                                                             | 0.001275 | + | 1.93        |
| 201232_at | SLC16A13         | solute carrier family 16, member 13 (monocarboxylic acid transporter 13) [Source:HGNC Symbol;Acc:31037]             | 0.002473 | + | 1.93        |
| 2224_at   | FDPS             | <b>farnesyl diphosphate synthase [Source:HGNC Symbol;Acc:3631]</b>                                                  | 0.005014 | + | <b>1.91</b> |
| 64109_at  | CRLF2            | cytokine receptor-like factor 2 [Source:HGNC Symbol;Acc:14281]                                                      | 0.004709 | + | 1.91        |
| 4923_at   | NTSR1            | neurotensin receptor 1 (high affinity) [Source:HGNC Symbol;Acc:8039]                                                | 0.003909 | + | 1.90        |
| 93129_at  | ORAI3            | ORAI calcium release-activated calcium modulator 3 [Source:HGNC Symbol;Acc:28185]                                   | 0.005522 | + | 1.90        |
| 11022_at  | TDRKH            | tudor and KH domain containing [Source:HGNC Symbol;Acc:11713]                                                       | 0.001136 | + | 1.88        |
| 6038_at   | RNASE4           | ribonuclease, RNase A family, 4 [Source:HGNC Symbol;Acc:10047]                                                      | 0.001468 | + | 1.88        |
| 10577_at  | NPC2             | Niemann-Pick disease, type C2 [Source:HGNC Symbol;Acc:14537]                                                        | 0.001893 | + | 1.87        |
| 1649_at   | DDIT3            | DNA-damage-inducible transcript 3 [Source:HGNC Symbol;Acc:2726]                                                     | 0.001468 | + | 1.86        |
| 253039_at | PSMD5-AS1        | PSMD5 antisense RNA 1 (head to head) [Source:HGNC Symbol;Acc:27367]                                                 | 0.010868 | + | 1.84        |
| 2026_at   | ENO2             | enolase 2 (gamma, neuronal) [Source:HGNC Symbol;Acc:3353]                                                           | 0.001468 | + | 1.83        |
| 3949_at   | LDLR             | low density lipoprotein receptor [Source:HGNC Symbol;Acc:6547]                                                      | 0.000464 | + | 1.82        |
| 5743_at   | PTGS2            | prostaglandin-endoperoxide synthase 2 (prostaglandin G/H synthase and cyclooxygenase) [Source:HGNC Symbol;Acc:9605] | 0.016853 | + | 1.82        |
| 79888_at  | LPCAT1           | lysophosphatidylcholine acyltransferase 1 [Source:HGNC Symbol;Acc:25718]                                            | 0.000818 | + | 1.80        |

|                |              |                                                                                              |          |   |             |
|----------------|--------------|----------------------------------------------------------------------------------------------|----------|---|-------------|
| 2222_at        | FDFT1        | <b>farnesyl-diphosphate farnesyltransferase 1 [Source:HGNC Symbol;Acc:3629]</b>              | 0.001397 | + | <b>1.80</b> |
| 10493_at       | VAT1         | vesicle amine transport protein 1 homolog (T. californica) [Source:HGNC Symbol;Acc:16919]    | 0.000754 | + | 1.79        |
| 79071_at       | ELOVL6       | ELOVL fatty acid elongase 6 [Source:HGNC Symbol;Acc:15829]                                   | 0.000951 | + | 1.79        |
| 11221_at       | DUSP10       | dual specificity phosphatase 10 [Source:HGNC Symbol;Acc:3065]                                | 0.002159 | + | 1.78        |
| 170393_at      | C10orf91     | chromosome 10 open reading frame 91 [Source:HGNC Symbol;Acc:27275]                           | 0.019345 | + | 1.77        |
| 23475_at       | QPRT         | quinolinate phosphoribosyltransferase [Source:HGNC Symbol;Acc:9755]                          | 0.007715 | + | 1.77        |
| 4084_at        | MXD1         | MAX dimerization protein 1 [Source:HGNC Symbol;Acc:6761]                                     | 0.001397 | + | 1.75        |
| 2896_at        | GRN          | granulin [Source:HGNC Symbol;Acc:4601]                                                       | 0.001136 | + | 1.75        |
| 978_at         | CDA          | cytidine deaminase [Source:HGNC Symbol;Acc:1712]                                             | 0.011368 | + | 1.75        |
| 64342_at       | HS1BP3       | HCLS1 binding protein 3 [Source:HGNC Symbol;Acc:24979]                                       | 0.001577 | + | 1.75        |
| 326625_at      | MMAB         | methylmalonic aciduria (cobalamin deficiency) cblB type [Source:HGNC Symbol;Acc:19331]       | 0.002473 | + | 1.74        |
| 6809_at        | STX3         | syntaxin 3 [Source:HGNC Symbol;Acc:11438]                                                    | 0.007715 | + | 1.74        |
| <b>6309_at</b> | <b>SC5D</b>  | <b>sterol-C5-desaturase [Source:HGNC Symbol;Acc:10547]</b>                                   | 0.001577 | + | <b>1.73</b> |
| 2706_at        | GJB2         | gap junction protein, beta 2, 26kDa [Source:HGNC Symbol;Acc:4284]                            | 0.005976 | + | 1.73        |
| 23558_at       | WBP2         | WW domain binding protein 2 [Source:HGNC Symbol;Acc:12738]                                   | 0.006812 | + | 1.73        |
| 1543_at        | CYP1A1       | cytochrome P450, family 1, subfamily A, polypeptide 1 [Source:HGNC Symbol;Acc:2595]          | 0.001397 | + | 1.72        |
| 84002_at       | B3GNT5       | UDP-GlcNAc:betaGal beta-1,3-N-acetylglucosaminyltransferase 5 [Source:HGNC Symbol;Acc:15684] | 0.004175 | + | 1.71        |
| 100129518_at   | SOD2         | superoxide dismutase 2, mitochondrial [Source:HGNC Symbol;Acc:11180]                         | 0.001436 | + | 1.71        |
| 145788_at      | C15orf65     | chromosome 15 open reading frame 65 [Source:HGNC Symbol;Acc:44654]                           | 0.008228 | + | 1.71        |
| <b>1717_at</b> | <b>DHCR7</b> | <b>7-dehydrocholesterol reductase [Source:HGNC Symbol;Acc:2860]</b>                          | 0.001945 | + | <b>1.70</b> |
| 79772_at       | MCPT1        | multiple C2 domains, transmembrane 1 [Source:HGNC Symbol;Acc:26183]                          | 0.003909 | + | 1.69        |
| 427_at         | ASAH1        | N-acylsphingosine amidohydrolase (acid ceramidase) 1 [Source:HGNC Symbol;Acc:735]            | 0.000818 | + | 1.69        |
| 96459_at       | FNIP1        | folliculin interacting protein 1 [Source:HGNC Symbol;Acc:29418]                              | 0.001407 | + | 1.68        |
| 901_at         | CCNG2        | cyclin G2 [Source:HGNC Symbol;Acc:1593]                                                      | 0.001961 | + | 1.68        |
| 3576_at        | IL8          | interleukin 8 [Source:HGNC Symbol;Acc:6025]                                                  | 0.005943 | + | 1.68        |
| 8303_at        | SNN          | stannin [Source:HGNC Symbol;Acc:11149]                                                       | 0.006699 | + | 1.67        |
| 10263_at       | CDK2AP2      | cyclin-dependent kinase 2 associated protein 2 [Source:HGNC Symbol;Acc:30833]                | 0.010571 | + | 1.67        |
| 6275_at        | S100A4       | S100 calcium binding protein A4 [Source:HGNC Symbol;Acc:10494]                               | 0.013825 | + | 1.66        |
| 374383_at      | NCR3LG1      | natural killer cell cytotoxicity receptor 3 ligand 1 [Source:HGNC Symbol;Acc:42400]          | 0.009915 | + | 1.66        |
| 1200_at        | TPP1         | tripeptidyl peptidase I [Source:HGNC Symbol;Acc:2073]                                        | 0.004175 | + | 1.66        |

|           |           |                                                                                                                        |          |   |      |
|-----------|-----------|------------------------------------------------------------------------------------------------------------------------|----------|---|------|
| 51171_at  | HSD17B14  | hydroxysteroid (17-beta) dehydrogenase 14 [Source:HGNC Symbol;Acc:23238]                                               | 0.02697  | + | 1.65 |
| 90271_at  | NA        | NA                                                                                                                     | 0.018339 | + | 1.65 |
| 26503_at  | SLC17A5   | solute carrier family 17 (anion/sugar transporter), member 5 [Source:HGNC Symbol;Acc:10933]                            | 0.002429 | + | 1.65 |
| 3552_at   | IL1A      | interleukin 1, alpha [Source:HGNC Symbol;Acc:5991]                                                                     | 0.005976 | + | 1.64 |
| 7111_at   | TMOD1     | tropomodulin 1 [Source:HGNC Symbol;Acc:11871]                                                                          | 0.002591 | + | 1.64 |
| 11182_at  | SLC2A6    | solute carrier family 2 (facilitated glucose transporter), member 6 [Source:HGNC Symbol;Acc:11011]                     | 0.028888 | + | 1.64 |
| 7128_at   | TNFAIP3   | tumor necrosis factor, alpha-induced protein 3 [Source:HGNC Symbol;Acc:11896]                                          | 0.002599 | + | 1.63 |
| 79639_at  | TMEM53    | transmembrane protein 53 [Source:HGNC Symbol;Acc:26186]                                                                | 0.014775 | + | 1.62 |
| 23175_at  | LPIN1     | lipin 1 [Source:HGNC Symbol;Acc:13345]                                                                                 | 0.001241 | + | 1.62 |
| 1185_at   | CLCN6     | chloride channel, voltage-sensitive 6 [Source:HGNC Symbol;Acc:2024]                                                    | 0.002917 | + | 1.62 |
| 5833_at   | PCYT2     | phosphate cytidylyltransferase 2, ethanolamine [Source:HGNC Symbol;Acc:8756]                                           | 0.001774 | + | 1.62 |
| 4881_at   | NPR1      | natriuretic peptide receptor A/guanylate cyclase A (atrionatriuretic peptide receptor A) [Source:HGNC Symbol;Acc:7943] | 0.037329 | + | 1.61 |
| 5909_at   | RAP1GAP   | RAP1 GTPase activating protein [Source:HGNC Symbol;Acc:9858]                                                           | 0.007366 | + | 1.61 |
| 55747_at  | FAM21B    | family with sequence similarity 21, member B [Source:HGNC Symbol;Acc:23417]                                            | 0.016853 | + | 1.61 |
| 2760_at   | GM2A      | GM2 ganglioside activator [Source:HGNC Symbol;Acc:4367]                                                                | 0.027387 | + | 1.61 |
| 153830_at | RNF145    | ring finger protein 145 [Source:HGNC Symbol;Acc:20853]                                                                 | 0.001275 | + | 1.60 |
| 158160_at | HSD17B7P2 | hydroxysteroid (17-beta) dehydrogenase 7 pseudogene 2 [Source:HGNC Symbol;Acc:28120]                                   | 0.037017 | + | 1.59 |
| 399694_at | SHC4      | SHC (Src homology 2 domain containing) family, member 4 [Source:HGNC Symbol;Acc:16743]                                 | 0.024048 | + | 1.59 |
| 64121_at  | RRAGC     | Ras-related GTP binding C [Source:HGNC Symbol;Acc:19902]                                                               | 0.002872 | + | 1.59 |
| 3382_at   | ICA1      | islet cell autoantigen 1, 69kDa [Source:HGNC Symbol;Acc:5343]                                                          | 0.006699 | + | 1.58 |
| 113146_at | AHNAK2    | AHNAK nucleoprotein 2 [Source:HGNC Symbol;Acc:20125]                                                                   | 0.003501 | + | 1.58 |
| 10468_at  | FST       | folliculin [Source:HGNC Symbol;Acc:3971]                                                                               | 0.008094 | + | 1.57 |
| 90809_at  | TMEM55B   | transmembrane protein 55B [Source:HGNC Symbol;Acc:19299]                                                               | 0.002159 | + | 1.57 |
| 3992_at   | FADS1     | fatty acid desaturase 1 [Source:HGNC Symbol;Acc:3574]                                                                  | 0.001397 | + | 1.56 |
| 6550_at   | SLC9A3    | solute carrier family 9, subfamily A (NHE3, cation proton antiporter 3), member 3 [Source:HGNC Symbol;Acc:11073]       | 0.022653 | + | 1.56 |
| 9586_at   | CREB5     | cAMP responsive element binding protein 5 [Source:HGNC Symbol;Acc:16844]                                               | 0.039378 | + | 1.55 |
| 50640_at  | PNPLA8    | patatin-like phospholipase domain containing 8 [Source:HGNC Symbol;Acc:28900]                                          | 0.006044 | + | 1.55 |
| 222487_at | GPR97     | G protein-coupled receptor 97 [Source:HGNC Symbol;Acc:13728]                                                           | 0.013261 | + | 1.55 |
| 3164_at   | NR4A1     | nuclear receptor subfamily 4, group A, member 1 [Source:HGNC Symbol;Acc:7980]                                          | 0.037426 | + | 1.55 |
| 50814_at  | NSDHL     | NAD(P) dependent steroid dehydrogenase-like [Source:HGNC Symbol;Acc:13398]                                             | 0.004175 | + | 1.55 |

|              |                |                                                                                                       |          |   |      |
|--------------|----------------|-------------------------------------------------------------------------------------------------------|----------|---|------|
| 9122_at      | SLC16A4        | solute carrier family 16, member 4 (monocarboxylic acid transporter 5) [Source:HGNC Symbol;Acc:10925] | 0.002795 | + | 1.55 |
| 8320_at      | EOMES          | eomesodermin [Source:HGNC Symbol;Acc:3372]                                                            | 0.009223 | + | 1.54 |
| 3727_at      | JUND           | jun D proto-oncogene [Source:HGNC Symbol;Acc:6206]                                                    | 0.002429 | + | 1.54 |
| 140576_at    | S100A16        | S100 calcium binding protein A16 [Source:HGNC Symbol;Acc:20441]                                       | 0.005356 | + | 1.54 |
| 22933_at     | SIRT2          | sirtuin 2 [Source:HGNC Symbol;Acc:10886]                                                              | 0.006853 | + | 1.54 |
| 6721_at      | SREBF2         | sterol regulatory element binding transcription factor 2 [Source:HGNC Symbol;Acc:11290]               | 0.003379 | + | 1.53 |
| 56204_at     | FAM214A        | family with sequence similarity 214, member A [Source:HGNC Symbol;Acc:25609]                          | 0.014109 | + | 1.53 |
| 286343_at    | LURAP1L        | leucine rich adaptor protein 1-like [Source:HGNC Symbol;Acc:31452]                                    | 0.006075 | + | 1.52 |
| 2034_at      | EPAS1          | endothelial PAS domain protein 1 [Source:HGNC Symbol;Acc:3374]                                        | 0.002716 | + | 1.52 |
| 84418_at     | CYSTM1         | cysteine-rich transmembrane module containing 1 [Source:HGNC Symbol;Acc:30239]                        | 0.007715 | + | 1.52 |
| 51646_at     | YPEL5          | yippee-like 5 (Drosophila) [Source:HGNC Symbol;Acc:18329]                                             | 0.027319 | + | 1.51 |
| 729096_at    | RP11-574K11.28 |                                                                                                       | 0.046427 | + | 1.51 |
| 353189_at    | SLCO4C1        | solute carrier organic anion transporter family, member 4C1 [Source:HGNC Symbol;Acc:23612]            | 0.047958 | + | 1.51 |
| 112483_at    | SAT2           | spermidine/spermine N1-acetyltransferase family member 2 [Source:HGNC Symbol;Acc:23160]               | 0.012976 | + | 1.51 |
| 22795_at     | NID2           | nidogen 2 (osteonidogen) [Source:HGNC Symbol;Acc:13389]                                               | 0.002591 | + | 1.51 |
| 134429_at    | STARD4         | StAR-related lipid transfer (START) domain containing 4 [Source:HGNC Symbol;Acc:18058]                | 0.002574 | + | 1.50 |
| 100128077_at | NA             | NA                                                                                                    | 0.010873 | + | 1.50 |
| 94241_at     | TP53INP1       | tumor protein p53 inducible nuclear protein 1 [Source:HGNC Symbol;Acc:18022]                          | 0.045657 | + | 1.50 |
| 84962_at     | AJUBA          | ajuba LIM protein [Source:HGNC Symbol;Acc:20250]                                                      | 0.025389 | - | 1.51 |
| 100616214_at | MIR4667        | microRNA 4667 [Source:HGNC Symbol;Acc:41723]                                                          | 0.01897  | - | 1.53 |
| 64759_at     | TNS3           | tensin 3 [Source:HGNC Symbol;Acc:21616]                                                               | 0.001936 | - | 1.53 |
| 6775_at      | STAT4          | signal transducer and activator of transcription 4 [Source:HGNC Symbol;Acc:11365]                     | 0.02307  | - | 1.54 |
| 57211_at     | GPR126         | G protein-coupled receptor 126 [Source:HGNC Symbol;Acc:13841]                                         | 0.004308 | - | 1.56 |
| 26251_at     | KCNQ2          | potassium voltage-gated channel, subfamily G, member 2 [Source:HGNC Symbol;Acc:6249]                  | 0.021629 | - | 1.56 |
| 306_at       | ANXA3          | annexin A3 [Source:HGNC Symbol;Acc:541]                                                               | 0.003137 | - | 1.57 |
| 56670_at     | SUCNR1         | succinate receptor 1 [Source:HGNC Symbol;Acc:4542]                                                    | 0.001615 | - | 1.59 |
| 22943_at     | DKK1           | dickkopf WNT signaling pathway inhibitor 1 [Source:HGNC Symbol;Acc:2891]                              | 0.011334 | - | 1.61 |
| 8908_at      | GYG2           | glycogenin 2 [Source:HGNC Symbol;Acc:4700]                                                            | 0.012667 | - | 1.61 |
| 10769_at     | PLK2           | polo-like kinase 2 [Source:HGNC Symbol;Acc:19699]                                                     | 0.013326 | - | 1.61 |
| 30832_at     | ZNF354C        | zinc finger protein 354C [Source:HGNC Symbol;Acc:16736]                                               | 0.021783 | - | 1.62 |

|              |         |                                                                                                 |          |   |      |
|--------------|---------|-------------------------------------------------------------------------------------------------|----------|---|------|
| 51421_at     | AMOTL2  | angiomotin like 2 [Source:HGNC Symbol;Acc:17812]                                                | 0.004566 | - | 1.65 |
| 7091_at      | TLE4    | transducin-like enhancer of split 4 (E(sp1) homolog, Drosophila) [Source:HGNC Symbol;Acc:11840] | 0.023041 | - | 1.66 |
| 7052_at      | TGM2    | transglutaminase 2 [Source:HGNC Symbol;Acc:11778]                                               | 0.001265 | - | 1.67 |
| 27063_at     | ANKRD1  | ankyrin repeat domain 1 (cardiac muscle) [Source:HGNC Symbol;Acc:15819]                         | 0.008632 | - | 1.68 |
| 26287_at     | ANKRD2  | ankyrin repeat domain 2 (stretch responsive muscle) [Source:HGNC Symbol;Acc:495]                | 0.002591 | - | 1.79 |
| 29015_at     | SLC43A3 | solute carrier family 43, member 3 [Source:HGNC Symbol;Acc:17466]                               | 0.02697  | - | 1.79 |
| 3486_at      | IGFBP3  | insulin-like growth factor binding protein 3 [Source:HGNC Symbol;Acc:5472]                      | 0.003243 | - | 1.79 |
| 1906_at      | EDN1    | endothelin 1 [Source:HGNC Symbol;Acc:3176]                                                      | 0.004655 | - | 1.79 |
| 100287477_at | NA      | NA                                                                                              | 0.009821 | - | 1.80 |
| 3491_at      | CYR61   | cysteine-rich, angiogenic inducer, 61 [Source:HGNC Symbol;Acc:2654]                             | 0.00109  | - | 1.82 |
| 9619_at      | ABCG1   | ATP-binding cassette, sub-family G (WHITE), member 1 [Source:HGNC Symbol;Acc:73]                | 0.011874 | - | 1.85 |
| 27092_at     | CACNG4  | calcium channel, voltage-dependent, gamma subunit 4 [Source:HGNC Symbol;Acc:1408]               | 0.002468 | - | 1.88 |
| 57393_at     | TMEM27  | transmembrane protein 27 [Source:HGNC Symbol;Acc:29437]                                         | 0.0005   | - | 1.92 |
| 794_at       | CALB2   | calbindin 2 [Source:HGNC Symbol;Acc:1435]                                                       | 0.012946 | - | 1.97 |
| 7057_at      | THBS1   | thrombospondin 1 [Source:HGNC Symbol;Acc:11785]                                                 | 0.001397 | - | 2.29 |
| 56256_at     | SERTAD4 | SERTA domain containing 4 [Source:HGNC Symbol;Acc:25236]                                        | 0.006075 | - | 2.42 |

NCI-H460 cells were treated for 24 h with 6.9  $\mu$ M TXA1.HCl or water (control) and differentially expressed genes were identified. Values represent the log2 and fold change observed in gene expression in TXA1.HCl cells when compared with the control. Only genes which are upregulated or downregulated in TXA1.HCl treated cells when compared to the control ( $\geq 1.5$ -fold and  $p$  value of  $\leq 0.05$ ) are represented. Among these genes, the ones involved in the terpenoid and steroid biosynthesis pathways are written in bold letters.
